# Supplementary material for: The French National Registry of patients with Facioscapulohumeral muscular dystrophy
Source: Springer Nature journal article supplement (doi:10.1186/s13023-018-0960-x), 2018-12-01
Supplement: MOESM3 [file 16314342]

# French National Registry on FSHD

## CLINICAL EVALUATION FORM "FSHD with no D4Z4 contraction"

|                                                                                                                                                                                                      |                                                                                                                                                 |
|------------------------------------------------------------------------------------------------------------------------------------------------------------------------------------------------------|-------------------------------------------------------------------------------------------------------------------------------------------------|
| - Last Name (initial)  __       First Name (initial)  __ <br>- Birth date (month/year): ____/____      - Gender: F <input type="checkbox"/> M <input type="checkbox"/><br>- Primary residence: _____ | Date of consult: ____/____/_____<br><input type="checkbox"/> Form #1 (INCLUSION)<br><input type="checkbox"/> Follow-up form #  __  → PIN: _____ |
| Name of the physician specialized in neuromuscular disorders recruiting the patient: _____<br>Center: _____                                                                                          | Signature _____<br>Office stamps of physician (including name) _____                                                                            |

### A. CIRCUMSTANCES AND ELEMENTS OF DIAGNOSIS

*To be completed at inclusion only*

1. Year of clinical diagnosis \_\_\_\_\_
2. Age at first symptoms \_\_\_\_\_ years old
3. First symptom according to patient
 

|                                                           |                                                          |
|-----------------------------------------------------------|----------------------------------------------------------|
| <input type="checkbox"/> Asymptomatic patient             | <input type="checkbox"/> Facial involvement              |
| <input type="checkbox"/> Proximal upper limb involvement  | <input type="checkbox"/> Proximal lower limb involvement |
| <input type="checkbox"/> Distal upper limb involvement    | <input type="checkbox"/> Distal lower limb involvement   |
| <input type="checkbox"/> Other → if other, specify: _____ |                                                          |
4. Family history: affected family members (several answers possible)
 

None    Mother    Father    Brothers    Sisters    Others: \_\_\_\_\_

→ **GENEALOGICAL TREE:** ○ = healthy woman;  
 = healthy man; ● = affected woman; ■ = affected man
5. Molecular diagnostic of FSHD1
  - a. Laboratory:  Paris    Marseille  
 Other: \_\_\_\_\_
  - b. Analysis year: \_\_\_\_\_
  - c. 4q35/ D4Z4: number of repeats: |\_\_|\_\_| or ECORI  
 fragment length: \_\_\_\_\_ kb (from 10 to 38)
  - d. Mutation in SMCHD1 gene:  Yes    No  
 Not done
  - e. Methylation percentage: "FseI % methylation" \_\_\_\_\_ %    Not done

### B. DIAGNOSIS COMPLEMENT *To be completed at inclusion AND follow-up*

Data unchanged since last form

1. Other genetic tests: check the genetic tests that have been performed on your patient (several choices are possible):
2.
 

|                                                  |   |                     |           |            |
|--------------------------------------------------|---|---------------------|-----------|------------|
| <input type="checkbox"/> Calpain-3               | → | Results: ○ negative | ○ pending | ○ not done |
| <input type="checkbox"/> Dysferlin               | → | Results: ○ negative | ○ pending | ○ not done |
| <input type="checkbox"/> VCP                     | → | Results: ○ negative | ○ pending | ○ not done |
| <input type="checkbox"/> FHL1                    | → | Results: ○ negative | ○ pending | ○ not done |
| <input type="checkbox"/> Others → Specify: _____ | → | Results: ○ negative | ○ pending | ○ not done |
| _____                                            | → | Results: ○ negative | ○ pending | ○ not done |
| _____                                            | → | Results: ○ negative | ○ pending | ○ not done |

## French National Registry on FSHD

### 3. Other blood tests: check blood tests that have been performed on your patient (several choices are possible):

4.  CPT-II in leukocytes → Results:  negative  pending  not done  
 Dried blood spot GAA testing (*Pompe disease*) → Results:  negative  pending  not done  
 GAA in lymphocytes (*Pompe disease*) → Results:  negative  pending  not done  
 Lowest CPK values: Year: \_\_\_\_\_ x normal value

5. **EMG**  not done  **done** → Result:  Normal  Myogenic  Neurogenic

6. **Muscle biopsy:**  not done  **done** → Date of the muscle biopsy: \_\_\_\_/\_\_\_\_/\_\_\_\_

Result:  Normal (go to question #b) or  Abnormal, specify:

**a. Histology / Histochemistry:** if the biopsy is abnormal, specify (several choices are possible):

- Dystrophy →  no  yes
- Necrosis →  no  yes
- Inflammation →  no  yes
- Selective fiber atrophy →  no  yes
- Fiber-type grouping →  no  yes
- Vacuoles →  no  yes
- Inclusions →  no  yes
- Ragged red fibers or COX-neg. fibers →  no  yes, specify number: \_\_\_\_\_
- Others → Specify: \_\_\_\_\_

**b. Immunohistochemistry:** check the immunohistochemical analyzes done on the muscle biopsy (several choices are possible):

- DYS 1,2,3  Sarcoglycans  Caveolins  Dysferlin   $\alpha$ -/ $\beta$  dystroglycans  Merosin  
 Other, specify: \_\_\_\_\_

**c. Western blot:** check all western blots done on the muscle biopsy (several choices are possible):

- DYS 1,2,3  Sarcoglycans  Calpain-3  Dysferlin   $\alpha$ -/ $\beta$  dystroglycans  
 Other, specify: \_\_\_\_\_

**d. Additional tests:** check all additional tests done on the muscle biopsy (several choices are possible):

- Calpain-3 autocatalytic activity  
 Dosage of mitochondrial respiratory chain enzymes  
 Activity of glycolysis and glycogenesis enzymes  
 Other, specify: \_\_\_\_\_

### 5. Muscle MRI

- not done  **done, specify:**  Upper limbs  Lower limbs  Full body

## C. FOLLOW-UP DATA To be completed at inclusion AND follow-up

Data unchanged since last form

### 1. Current civil status

- Single  Separated  Domestic partnership  Civil union (PACS)  Married  Divorced  Widowed

### 2. Employment status

- Employed  Unemployed  Retired  Never employed  Termination of employment, check if due to FSHD:

Pupil / Student → **Education level:** \_\_\_\_\_

→ **Education environment:**  Normal (no help)  Normal with help  Specialized  
(support personnel, adjusted schedules)

### 3. Biometric data

Height \_\_\_\_\_ cm / Weight \_\_\_\_\_ kg

### 4. Handedness:

- Right-handed  Left-handed  Ambidextrous

# French National Registry on FSHD

## D. MUSCULAR AND FUNCTIONAL EVALUATIONS *To be completed at inclusion AND follow-up*

Data unchanged since last form

| 1. Facial involvement      | Un-affected | Affected | Un-certain |
|----------------------------|-------------|----------|------------|
| Wrinkle forehead           |             |          |            |
| Close eyes                 |             |          |            |
| Smile                      |             |          |            |
| Pucker lips (mimic a kiss) |             |          |            |
| Show teeth (platysma)      |             |          |            |

2. Tongue atrophy/weakness:  No  Yes

3. Weakness of the scapula fixator muscles:

Scapular winging:  No  Yes

4. Axial involvement:  No  Yes

5. Ability to walk:  No  Yes

**6. Functional autonomy:**

- Getting out of bed:  without using arms  without using arms  with the help of someone
- Getting up from a chair:  without using arms  without using arms  with the help of someone

**7. Manual muscle testing: 0-5**

| FACIAL INVOLVEMENT                                                       | R                                                                   | L  |
|--------------------------------------------------------------------------|---------------------------------------------------------------------|----|
| Orbicularis oculi                                                        | __                                                                  | __ |
| Orbicularis oris                                                         | __                                                                  | __ |
| AXIAL INVOLVEMENT                                                        |                                                                     |    |
| Neck flexor muscles                                                      | __                                                                  |    |
| Neck extensor muscles                                                    | __                                                                  |    |
| Trunk flexor muscles                                                     | __                                                                  |    |
| Trunk extensor muscles                                                   | __                                                                  |    |
| UPPER LIMBS                                                              | R                                                                   | L  |
| Shoulder antepulsion                                                     | __                                                                  | __ |
| Right scapular retropulsion (fixator)                                    | __                                                                  | __ |
| Shoulder Abduction: overall                                              | __                                                                  | __ |
| Shoulder abduction: deltoid muscle <i>(the scapula is held manually)</i> | __                                                                  | __ |
| Forearm flexion (biceps)                                                 | __                                                                  | __ |
| Forearm extension (triceps)                                              | __                                                                  | __ |
| Wrist flexion                                                            | __                                                                  | __ |
| Fingers flexion                                                          | __                                                                  | __ |
| Fingers extension                                                        | __                                                                  | __ |
| LOWER LIMBS                                                              | R                                                                   | L  |
| Hip flexion (ilio-psoas)                                                 | __                                                                  | __ |
| Leg extension (quadriceps)                                               | __                                                                  | __ |
| Leg flexion (hamstrings)                                                 | __                                                                  | __ |
| Foot dorsiflexion (tibialis anterior)                                    | __                                                                  | __ |
| Plantar flexion (triceps sural)                                          | __                                                                  | __ |
| Comments: _____                                                          | Asymmetry: <input type="checkbox"/> No <input type="checkbox"/> Yes |    |

# French National Registry on FSHD

## D. MUSCULAR AND FUNCTIONAL EVALUATIONS

(continued)

**8. Beevor's sign:** Movement of the navel towards the neck on flexing the neck (weakness of the lower abdominal muscles)

Untested     Absent     Present: direction  $\uparrow$  \_\_\_\_\_ cm / direction  $\downarrow$  \_\_\_\_\_ cm

**9. Functional tests**

| A. UPPER LIMBS                                                 |                                                                           |                                                                                                     |
|----------------------------------------------------------------|---------------------------------------------------------------------------|-----------------------------------------------------------------------------------------------------|
| Active elevation of arms (degrees)                             | L _____° R _____° <input type="checkbox"/> Not done                       | 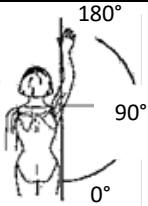                 |
| Brooke scale                                                   | ____ / 6 (see appendix #1) <input type="checkbox"/> Not done              |                                                                                                     |
| B. LOWER LIMBS                                                 |                                                                           |                                                                                                     |
| Timed 10-meter walk test                                       | _____ sec. <input type="checkbox"/> NA* <input type="checkbox"/> Not done | <input type="checkbox"/> With assistance → Specify: _____<br><input type="checkbox"/> No assistance |
| Four square step test                                          | _____ sec. <input type="checkbox"/> NA* <input type="checkbox"/> Not done | <input type="checkbox"/> With assistance → Specify: _____<br><input type="checkbox"/> No assistance |
| Vignos scale                                                   | ____ / 10 (see appendix #1) <input type="checkbox"/> Not done             |                                                                                                     |
| C. CLINICAL SEVERITY SCORE                                     |                                                                           |                                                                                                     |
| _____ / 10 (see appendix #2) <input type="checkbox"/> Not done |                                                                           |                                                                                                     |

**10. Reduced joint flexibility:**  No     Yes → Specify:  Shoulders     Elbows     Wrists     Fingers     Hips  
 Knees     Ankles     Other, specify: \_\_\_\_\_

**11. Joint or muscle pain:**  No     Yes

*If yes, specify:*

a. Date of onset (month / year): \_\_\_\_\_ / \_\_\_\_\_

b. Visual Analog Scale (VAS) on the day of consult: place a thin line perpendicular to the VAS line (**done by the patient**)

No pain \_\_\_\_\_ Extremely painful

c. Pain management:  None     Stretching     Massage

Drugs → specify: \_\_\_\_\_  Others → specify: \_\_\_\_\_

## E. THERAPEUTIC CARE

Data unchanged since last form

**1. Non-drug treatment:**

None     Physical therapy → number of sessions / week: \_\_\_\_

Orthophony → number of sessions / week: \_\_\_\_     Scapular fixation surgery →  Right     Left

**2. Assistive device**

None     Cane →  simple     crutch     tripod

Walker

Manual wheelchair → frequency of use:  occasionally     regularly     exclusively

Electric wheelchair → frequency of use:  occasionally     regularly     exclusively

Other, specify: \_\_\_\_\_

## French National Registry on FSHD

### F. CARDIAC INVOLVEMENT *To be completed at inclusion AND follow-up*

Data unchanged since last form   
  Not assessed   
  ABSENCE   
  PRESENCE \*

\*please complete below

1. Age at onset: \_\_\_\_ →  Patient interview data    or     Follow-up data
2. Symptoms:   
  Palpitations   
  Syncopes, fainting   
  Vertigo, dizziness   
  Retrosternal pain  
 No symptom but but abnormal exam   
  Other, specify: \_\_\_\_\_
3. Cardiac exams (if done, specify for each exam **the month and the year**):

|                   |                                                                               |                                                                                                                                                                                                                                                                                               |
|-------------------|-------------------------------------------------------------------------------|-----------------------------------------------------------------------------------------------------------------------------------------------------------------------------------------------------------------------------------------------------------------------------------------------|
| ECG               | <input type="checkbox"/> Done ___ / ____<br><input type="checkbox"/> Not done | <input type="checkbox"/> No anomaly <input type="checkbox"/> Conduction block <input type="checkbox"/> Arrhythmia<br><input type="checkbox"/> Others, specify: _____                                                                                                                          |
| Holter test       | <input type="checkbox"/> Done ___ / ____<br><input type="checkbox"/> Not done | <input type="checkbox"/> No anomaly <input type="checkbox"/> Conduction block <input type="checkbox"/> Arrhythmia<br><input type="checkbox"/> Others, specify: _____                                                                                                                          |
| Echo-cardiography | <input type="checkbox"/> Done ___ / ____<br><input type="checkbox"/> Not done | - <b>Left Ventricular Ejection Fraction:</b> _____ %<br>- <b>Cardiomyopathy:</b><br><input type="checkbox"/> No <input type="checkbox"/> Yes → <input type="checkbox"/> Dilated <input type="checkbox"/> Hypertrophic <input type="checkbox"/> Other: _____<br>- <b>Other, specify:</b> _____ |

4. Diagnosis retained: \_\_\_\_\_

### G. RESPIRATORY INVOLVEMENT *To be completed at inclusion AND follow-up*

Data unchanged since last form   
  Not assessed   
  ABSENCE   
  PRESENCE \*

\*please complete below

1. Age at onset \_\_\_\_ →  Patient interview data    or     Follow-up data
2. Symptoms:   
  Dyspnea on exertion   
  Dyspnea at rest   
  Orthopnea  
 Daytime sleepiness   
  Morning headaches   
  Others, specify: \_\_\_\_\_
3. Concomitant skeletal anomalies:
   
 Spine deformation   
  Pectus excavatum   
  Other, specify: \_\_\_\_\_   
  None
4. Exams (if done, specify for each exam **the month and the year**):

|                     |                                                                               |                                                                                                                                                               |
|---------------------|-------------------------------------------------------------------------------|---------------------------------------------------------------------------------------------------------------------------------------------------------------|
| PFT                 | <input type="checkbox"/> Done ___ / ____<br><input type="checkbox"/> Not done | FVC sitting _____%    FVC supine _____%                                                                                                                       |
| Blood gases at rest | <input type="checkbox"/> Done ___ / ____<br><input type="checkbox"/> Not Done | PO <sub>2</sub> _____ mmHg    PCO <sub>2</sub> _____ mmHg    Sat _____ %                                                                                      |
| Polysomnography     | <input type="checkbox"/> Done ___ / ____<br><input type="checkbox"/> Not Done | <b>Type of apnea:</b> <input type="checkbox"/> Obstructive <input type="checkbox"/> Central <input type="checkbox"/> Mixed<br>Apnea index:   _____   per hour |

5. Assisted ventilation:   
  No   
  Yes →  Invasive (tracheostomy)   
  Non-invasive, nasal mask  
 →  Permanent   
  Intermittent, as required   
  Intermittent, nocturnal

## French National Registry on FSHD

### H. OCULAR INVOLVEMENT *To be completed at inclusion AND follow-up*

Data unchanged since last form     Not assessed     ABSENCE     PRESENCE \*

\*please complete below

1. Age at onset: \_\_\_\_ →  Patient interview data    or     Follow-up data
2. Diagnosis:  Vascular retinopathy     Retinal Detachment     Coats' disease     Corneal ulcer  
 Others, specify: -----
3. Surgery:  No     Yes → if yes, reason of surgery: -----

### I. AUDITORY INVOLVEMENT *To be completed at inclusion AND follow-up*

Data unchanged since last form     Not assessed     ABSENCE     PRESENCE \*

\*please complete below

Year of last audiogram: \_\_\_\_  Not done

1. Age at onset: \_\_\_\_ →  Patient interview data    or     Follow-up data
2. Hearing aid:  No     Yes

### J. GASTRO-INTESTINAL INVOLVEMENT *To be completed at inclusion AND follow-up*

Data unchanged since last form     Not assessed     ABSENCE     PRESENCE \*

\*please complete below

1. Age at onset: \_\_\_\_ →  Patient interview data    or     Follow-up data
2. Symptoms:  Dysphagia     Pulmonary aspiration → specify number of pulmonary aspirations: \_\_\_\_ / week  
 Other, specify: -----
3. Endoscopic evaluation of swallowing:  Not done     done: Dysphagia detected ? :  No     Yes

### K. METABOLIC INVOLVEMENT *To be completed at inclusion AND follow-up*

Data unchanged since last form     Not assessed     ABSENCE     PRESENCE \*

\*please complete below

1. Age at onset: \_\_\_\_ →  Patient interview data    or     Follow-up data
2. Diagnosis:  Hypercholesterolemia     Hypertriglyceridemia     Other, specify: -----
3. Lipid-lowering treatment:  No     Yes → specify name(s) and length of treatment(s):  
-----

## French National Registry on FSHD

### L. ENDOCRINE INVOLVEMENT

*To be completed at inclusion AND follow-up*

Data unchanged since last form   
  Not assessed   
  ABSENCE   
  PRESENCE \*  
\*please complete below

1. Age at onset: \_\_\_\_ →  Patient interview data    or     Follow-up data
2. Type of disease:     Thyroid disorder     Diabetes     Other, specify: \_\_\_\_\_
3. Hormone therapy:  No     Yes → specify name(s) and length of treatment(s):  
 \_\_\_\_\_
4. Sexual hormone therapy:  No     Yes → specify name(s) and length of treatment(s):  
 \_\_\_\_\_

#### FOR ALL FEMALE SUBJECTS

- Pre-puberty     Puberty     Pre-menopause     Menopause → Age at menopause: \_\_\_\_
- Contraceptive treatment:  None     Oral contraceptive     Other, specify: \_\_\_\_\_
- Pregnancy: Number of pregnancies (gestity): \_\_\_\_    Number of children: \_\_\_\_

### M. TYPICAL AND ATYPICAL CHARACTERISTICS OF FSHD

*To be completed at inclusion AND follow-up*

- |                          |                                                                                                 |
|--------------------------|-------------------------------------------------------------------------------------------------|
| <input type="checkbox"/> | <b>TYPICAL:</b> at least 2 criteria in favor of a FSHD1 diagnosis <u>AND</u> 0 atypia criterion |
| <input type="checkbox"/> | <b>WITH ATYPIA:</b> at least 1 atypia criterion                                                 |

#### Check matching criteria

| CRITERIA IN FAVOR OF FSHD1 |                                                                               |
|----------------------------|-------------------------------------------------------------------------------|
| <input type="checkbox"/>   | Asymetry                                                                      |
| <input type="checkbox"/>   | Facial involvement (orbicularis oculi or orbicularis oris)                    |
| <input type="checkbox"/>   | Involvement of scapular fixator or tibialis anterior                          |
| ATYPIA CRITERIA            |                                                                               |
| <input type="checkbox"/>   | Ptosis, ophthalmoplegia or diplopia                                           |
| <input type="checkbox"/>   | Cardiological or respiratory involvement in the foreground OR SNC involvement |
| <input type="checkbox"/>   | Predominant involvement at the proximal lower limb or distal upper limb level |
| +                          |                                                                               |
| <input type="checkbox"/>   | EMG suggesting a neurogenic motor neuron disease or myotonia                  |
| <input type="checkbox"/>   | Muscle biopsy atypical or suggesting a muscle disorder                        |
| <input type="checkbox"/>   | Genetic diagnosis of another neuromuscular disorder confirmed                 |
| <input type="checkbox"/>   | Others: _____                                                                 |

**APPENDIX 1**

**BROOKE AND VIGNOS SCALES**

**UPPER LIMBS (Arms and shoulders)**

- 1** – Starting with arms at the sides, the patient can abduct the arms (kept extended) in a full circle until they touch above the head.
- 2** – Can raise arms above head only with elbows flexed or by using accessory muscles.
- 3** - Can raise hands to the mouth but cannot raise an 8-oz glass of water to the mouth (using both hands if necessary).
- 4** – Can raise hands to the mouth but cannot raise an 8-oz glass of water to the mouth.
- 5** - Cannot raise hands to the mouth but can use hands to hold a pen or pick up pennies from the table.
- 6** – Cannot raise hands to the mouth and has no useful function of hands.

**LOWER LIMBS**

- 1** – Walks and climbs stairs without assistance.
- 2** - Walks and climbs stair with the aid of the railing.
- 3** – Walks and climbs stairs slowly with the aid of the railing (over 12 seconds to climb four stairs).
- 4** – Walks unassisted and rises from a chair but cannot climb stairs.
- 5** – Walks unassisted but cannot rise from a chair or climb stairs.
- 6** – Walks only with assistance or walks independently with long leg braces.
- 7** – Walks with long leg braces but requires assistance for balance.
- 8** – Stands with long leg braces but unable to walk even with assistance
- 9** – Wheelchair-bound.
- 10** – Bedridden.

**APPENDIX 2**

**CLINICAL SEVERITY SCORE**

- 0** = No sign of muscle weakness.
- 1** = Facial weakness only.
- 2** = Mild scapular involvement without limitation of arm abduction; no awareness of disease symptoms is possible.
- 3** = Moderate involvement of scapular and arm muscles or both (arm abduction  $>60^\circ$  and strength  $\geq 3$  in arm muscles); no involvement of pelvic and leg muscles.
- 4** = Severe scapular involvement (arm abduction  $<60^\circ$  on at least one side); strength  $<3$  in at least one muscular district of the arms; no involvement of pelvic and leg muscles.
- 5** = Tibioperoneal weakness; no weakness of pelvic and proximal leg muscles.
- 6** = Mild weakness of pelvic and proximal leg muscles or both (strength  $\geq 4$  in all these muscles); able to stand up from a chair without support.
- 7** = Moderate weakness of pelvic and proximal leg muscles or both (strength  $\geq 3$  in all these muscles); able to stand up from a chair with monolateral support.
- 8** = Severe weakness of pelvic and proximal leg muscles or both (strength  $<3$  in at least one of these muscles); able to stand up from a chair with double support; unable to climb stairs; able to walk unaided.
- 9** = Unable to stand up from a chair; walking limited to several steps with support; may use wheelchair for most activities.
- 10** = Wheelchair-bound.
