# Supplementary material for: The French National Registry of patients with Facioscapulohumeral muscular dystrophy
Source: Springer Nature journal article supplement (doi:10.1186/s13023-018-0960-x), 2018-12-01
Supplement: MOESM7 [file 16314342]

|                                                |   |    |   |   |   |    |    |    |    |   |    |   |   |    |   |
|------------------------------------------------|---|----|---|---|---|----|----|----|----|---|----|---|---|----|---|
| Blood gases                                    |   | ✓  |   |   |   |    | ✓  | ✓  |    |   |    |   |   | ✓  |   |
| Polysomnography                                |   | ✓  |   |   |   | ✓  | ✓  | ✓  | ✓  |   |    |   |   | ✓  |   |
| Assisted breathing                             |   | ✓  |   |   |   |    | ✓  |    |    | ✓ |    |   |   | ✓  |   |
| Eye disorder                                   |   | ✓  |   |   |   |    | ✓  | ✓  | ✓  |   |    |   |   | ✓  |   |
| Ophthalmic surgery                             |   |    |   |   |   | ✓  | ✓  |    | ✓  |   |    |   |   | ✓  |   |
| Hearing disorder                               |   | ✓  |   |   |   |    | ✓  | ✓  | ✓  |   |    |   |   | ✓  |   |
| Hearing aid                                    |   | ✓  |   |   |   |    |    | ✓  | ✓  |   |    |   |   | ✓  |   |
| Gastrointestinal disease                       |   |    |   |   |   | ✓  | ✓  | ✓  | ✓  |   |    |   |   | ✓  |   |
| Fiberoptic endoscopic evaluation of swallowing |   | ✓  |   |   |   |    |    |    |    |   |    |   |   | ✓  |   |
| Metabolic disease                              |   | ✓  |   |   |   |    | ✓  | ✓  | ✓  |   |    |   |   | ✓  |   |
| Lipid-lowering therapy                         |   | ✓  |   |   |   |    |    |    |    |   |    |   |   | ✓  |   |
| Endocrine disorder                             |   | ✓  |   |   |   | ✓  | ✓  |    | ✓  |   |    |   |   | ✓  |   |
| Hormone therapy                                |   | ✓  |   |   |   | ✓  | ✓  | ✓  | ✓  |   |    |   |   | ✓  |   |
| TOTAL                                          | 3 | 37 | 0 | 1 | 1 | 20 | 28 | 22 | 32 | 5 | 11 | 3 | 2 | 45 | 1 |
