# Supplementary material for: The French National Registry of patients with Facioscapulohumeral muscular dystrophy
Source: Orphanet J Rare Dis. 2018 Dec 4;13:218. doi: 10.1186/s13023-018-0960-x (PMC6280451; doi:10.1186/s13023-018-0960-x)
Supplement: Supplementary file 2 — Figure S2. French National FSHD registry - INCLUSION FORM (PDF 431 kb) [file 13023_2018_960_MOESM2_ESM.pdf]

# French National Registry on FSHD

## CLINICAL EVALUATION FORM "Type 1 FSHD"

|                                                                                                                                                                                            |                                                                                                                                                |
|--------------------------------------------------------------------------------------------------------------------------------------------------------------------------------------------|------------------------------------------------------------------------------------------------------------------------------------------------|
| - Last Name (initial)  __  First Name (initial)  __ <br>- Birth date (month/year): ____/____ - Gender: F <input type="checkbox"/> M <input type="checkbox"/><br>- Primary residence: _____ | Date of consult: ____/____/____<br><input type="checkbox"/> Form #1 (INCLUSION)<br><input type="checkbox"/> Follow-up form #  __  → PIN: _____ |
| Name of the physician specialized in neuromuscular disorders recruiting the patient: _____<br>Center: _____                                                                                | Signature _____<br>Office stamps of physician (including name) _____                                                                           |

### A. CIRCUMSTANCES AND ELEMENTS OF DIAGNOSIS

*To be completed at inclusion only*

|                                                                                                                                                                                                                                                                                                                                                                                                                                                                                                                                                                                                                    |                                                |
|--------------------------------------------------------------------------------------------------------------------------------------------------------------------------------------------------------------------------------------------------------------------------------------------------------------------------------------------------------------------------------------------------------------------------------------------------------------------------------------------------------------------------------------------------------------------------------------------------------------------|------------------------------------------------|
| <b>1. Year of clinical diagnosis</b> ____                                                                                                                                                                                                                                                                                                                                                                                                                                                                                                                                                                          | <b>2. Age at first symptoms</b> ____ years old |
| <b>3. First symptom according to patient</b><br><div style="display: flex; justify-content: space-between;"> <div style="width: 48%;"> <input type="checkbox"/> Asymptomatic patient<br/> <input type="checkbox"/> Proximal upper limb involvement<br/> <input type="checkbox"/> Distal upper limb involvement<br/> <input type="checkbox"/> Other → if other, specify: _____         </div> <div style="width: 48%;"> <input type="checkbox"/> Facial involvement<br/> <input type="checkbox"/> Proximal lower limb involvement<br/> <input type="checkbox"/> Distal lower limb involvement         </div> </div> |                                                |
| <b>4. Family history: affected family members (several answers possible)</b><br><input type="checkbox"/> None <input type="checkbox"/> Mother <input type="checkbox"/> Father <input type="checkbox"/> Brothers <input type="checkbox"/> Sisters <input type="checkbox"/> Others: _____<br><br>→ <b>GENEALOGICAL TREE:</b> ○ = healthy woman;<br><input type="checkbox"/> = healthy man; ● = affected woman; ■ = affected man<br><div style="border: 1px solid black; height: 100px; width: 400px; margin-top: 10px;"></div>                                                                                       |                                                |
| <b>5. Molecular diagnostic of FSHD1</b><br>a. Laboratory: <input type="checkbox"/> Paris <input type="checkbox"/> Marseille<br><input type="checkbox"/> Other: _____<br><br>b. Analysis year: _____<br><br>c. 4q35/ D4Z4: number of repeats:  __  or ECORI<br>fragment length: _____ kb (from 10 to 38)<br><br>d. Check if mosaic: <input type="checkbox"/>                                                                                                                                                                                                                                                        |                                                |

### B. FOLLOW-UP DATA *To be completed at inclusion AND follow-up*

☐ Data unchanged since last form

|                                                                                                                                                                                                                                                                                                                                                                                                                                                                                                                                                                                                                                                                                                                                                                                                                                                                 |                                                                                                                                                                                                              |
|-----------------------------------------------------------------------------------------------------------------------------------------------------------------------------------------------------------------------------------------------------------------------------------------------------------------------------------------------------------------------------------------------------------------------------------------------------------------------------------------------------------------------------------------------------------------------------------------------------------------------------------------------------------------------------------------------------------------------------------------------------------------------------------------------------------------------------------------------------------------|--------------------------------------------------------------------------------------------------------------------------------------------------------------------------------------------------------------|
| <b>1. Current civil status</b><br><input type="checkbox"/> Single <input type="checkbox"/> Separated <input type="checkbox"/> Domestic partnership <input type="checkbox"/> Civil union (PACS) <input type="checkbox"/> Married <input type="checkbox"/> Divorced <input type="checkbox"/> Widowed<br><br><b>2. Employment status</b><br><input type="checkbox"/> Employed <input type="checkbox"/> Unemployed <input type="checkbox"/> Retired <input type="checkbox"/> Never employed <input type="checkbox"/> Termination of employment, check if due to FSHD: <input type="checkbox"/><br><input type="checkbox"/> Pupil / Student<br>→ Education level: _____<br>→ Education environment: <input type="checkbox"/> Normal (no help) <input type="checkbox"/> Normal with help (support personnel, adjusted schedules) <input type="checkbox"/> Specialized | <b>3. Biometric data</b><br>Height ____ cm / Weight ____ kg<br><br><b>4. Handedness:</b><br><input type="checkbox"/> Right-handed <input type="checkbox"/> Left-handed <input type="checkbox"/> Ambidextrous |
|-----------------------------------------------------------------------------------------------------------------------------------------------------------------------------------------------------------------------------------------------------------------------------------------------------------------------------------------------------------------------------------------------------------------------------------------------------------------------------------------------------------------------------------------------------------------------------------------------------------------------------------------------------------------------------------------------------------------------------------------------------------------------------------------------------------------------------------------------------------------|--------------------------------------------------------------------------------------------------------------------------------------------------------------------------------------------------------------|

# French National Registry on FSHD

## C. MUSCULAR AND FUNCTIONAL EVALUATIONS *To be completed at inclusion AND follow-up*

☐ Data unchanged since last form

| 1. Facial involvement      | Un-affected | Affected | Un-certain |
|----------------------------|-------------|----------|------------|
| Wrinkle forehead           |             |          |            |
| Close eyes                 |             |          |            |
| Smile                      |             |          |            |
| Pucker lips (mimic a kiss) |             |          |            |
| Show teeth (platysma)      |             |          |            |

2. Tongue atrophy/weakness: ☐ No ☐ Yes

3. Weakness of the scapula fixator muscles:

Scapular winging: ☐ No ☐ Yes

4. Axial involvement: ☐ No ☐ Yes

5. Ability to walk: ☐ No ☐ Yes

### 6. Functional autonomy:

- Getting out of bed: ☐ without using arms ☐ without using arms ☐ with the help of someone  
 - Getting up from a chair: ☐ without using arms ☐ without using arms ☐ with the help of someone

### 7. Manual muscle testing: 0-5

| FACIAL INVOLVEMENT                                                | R                                                                   | L  |
|-------------------------------------------------------------------|---------------------------------------------------------------------|----|
| Orbicularis oculi                                                 | __                                                                  | __ |
| Orbicularis oris                                                  | __                                                                  | __ |
| AXIAL INVOLVEMENT                                                 |                                                                     |    |
| Neck flexor muscles                                               | __                                                                  |    |
| Neck extensor muscles                                             | __                                                                  |    |
| Trunk flexor muscles                                              | __                                                                  |    |
| Trunk extensor muscles                                            | __                                                                  |    |
| UPPER LIMBS                                                       | R                                                                   | L  |
| Shoulder antepulsion                                              | __                                                                  | __ |
| Right scapular retropulsion (fixator)                             | __                                                                  | __ |
| Shoulder Abduction: overall                                       | __                                                                  | __ |
| Shoulder abduction: deltoid muscle (the scapula is held manually) | __                                                                  | __ |
| Forearm flexion (biceps)                                          | __                                                                  | __ |
| Forearm extension (triceps)                                       | __                                                                  | __ |
| Wrist flexion                                                     | __                                                                  | __ |
| Fingers flexion                                                   | __                                                                  | __ |
| Fingers extension                                                 | __                                                                  | __ |
| LOWER LIMBS                                                       | R                                                                   | L  |
| Hip flexion (ilio-psoas)                                          | __                                                                  | __ |
| Leg extension (quadriceps)                                        | __                                                                  | __ |
| Leg flexion (hamstrings)                                          | __                                                                  | __ |
| Foot dorsiflexion (tibialis anterior)                             | __                                                                  | __ |
| Plantar flexion (triceps sural)                                   | __                                                                  | __ |
| Comments: _____                                                   | Asymmetry: <input type="checkbox"/> No <input type="checkbox"/> Yes |    |

**C. MUSCULAR AND FUNCTIONAL EVALUATIONS**

(continued)

**8. Beevor's sign:** Movement of the navel towards the neck on flexing the neck (weakness of the lower abdominal muscles)

☐ Untested ☐ Absent ☐ Present: direction  $\uparrow$  \_\_\_\_\_ cm / direction  $\downarrow$  \_\_\_\_\_ cm

**9. Functional tests**

| A. UPPER LIMBS                                                |                                                                          |                                                                                                     |
|---------------------------------------------------------------|--------------------------------------------------------------------------|-----------------------------------------------------------------------------------------------------|
| Active elevation of arms (degrees)                            | L _____ ° R _____ ° <input type="checkbox"/> Not done                    | 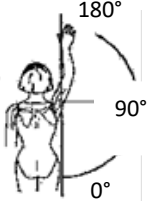                 |
| Brooke scale                                                  | ____ / 6 (see appendix #1) <input type="checkbox"/> Not done             |                                                                                                     |
| B. LOWER LIMBS                                                |                                                                          |                                                                                                     |
| Timed 10-meter walk test                                      | ____ sec. <input type="checkbox"/> NA* <input type="checkbox"/> Not done | <input type="checkbox"/> With assistance → Specify: _____<br><input type="checkbox"/> No assistance |
| Four square step test                                         | ____ sec. <input type="checkbox"/> NA* <input type="checkbox"/> Not done | <input type="checkbox"/> With assistance → Specify: _____<br><input type="checkbox"/> No assistance |
| Vignos scale                                                  | ____ / 10 (see appendix #1) <input type="checkbox"/> Not done            |                                                                                                     |
| C. CLINICAL SEVERITY SCORE                                    |                                                                          |                                                                                                     |
| ____ / 10 (see appendix #2) <input type="checkbox"/> Not done |                                                                          |                                                                                                     |

**10. Reduced joint flexibility:** ☐ No ☐ Yes → Specify: ☐ Shoulders ☐ Elbows ☐ Wrists ☐ Fingers ☐ Hips  
☐ Knees ☐ Ankles ☐ Other, specify: \_\_\_\_\_

**11. Joint or muscle pain:** ☐ No ☐ Yes

*If yes, specify:*

a. Date of onset (month / year): \_\_\_\_ / \_\_\_\_

b. Visual Analog Scale (VAS) on the day of consult: place a thin line perpendicular to the VAS line (*done by the patient*)

No pain \_\_\_\_\_ Extremely painful

c. Pain management: ☐ None ☐ Stretching ☐ Massage

☐ Drugs → specify: \_\_\_\_\_ ☐ Others → specify: \_\_\_\_\_

**D. THERAPEUTIC CARE**

☐ Data unchanged since last form

**1. Non-drug treatment:**

☐ None ☐ Physical therapy → number of sessions / week: \_\_\_\_

☐ Orthophony → number of sessions / week: \_\_\_\_ ☐ Scapular fixation surgery → ☐ Right ☐ Left

**2. Assistive device**

☐ None ☐ Cane → ☐ simple ☐ crutch ☐ tripod

☐ Walker

☐ Manual wheelchair → frequency of use: ☐ occasionally ☐ regularly ☐ exclusively

☐ Electric wheelchair → frequency of use: ☐ occasionally ☐ regularly ☐ exclusively

☐ Other, specify: \_\_\_\_\_

## French National Registry on FSHD

### E. CARDIAC INVOLVEMENT *To be completed at inclusion AND follow-up*

☐ Data unchanged since last form
 ☐ Not assessed
 ☐ ABSENCE
 ☐ PRESENCE \*
 \*please complete below

- Age at onset: \_\_\_\_ → ☐ Patient interview data or ☐ Follow-up data
- Symptoms:
 ☐ Palpitations
 ☐ Syncopes, fainting
 ☐ Vertigo, dizziness
 ☐ Retrosternal pain  
☐ No symptom but but abnormal exam
 ☐ Other, specify: \_\_\_\_\_
- Cardiac exams (if done, specify for each exam **the month and the year**):

|                   |                                                                                |                                                                                                                                                                                                                                                                                              |
|-------------------|--------------------------------------------------------------------------------|----------------------------------------------------------------------------------------------------------------------------------------------------------------------------------------------------------------------------------------------------------------------------------------------|
| ECG               | <input type="checkbox"/> Done ____ / ____<br><input type="checkbox"/> Not done | <input type="checkbox"/> No anomaly <input type="checkbox"/> Conduction block <input type="checkbox"/> Arrhythmia<br><input type="checkbox"/> Others, specify: _____                                                                                                                         |
| Holter test       | <input type="checkbox"/> Done ____ / ____<br><input type="checkbox"/> Not done | <input type="checkbox"/> No anomaly <input type="checkbox"/> Conduction block <input type="checkbox"/> Arrhythmia<br><input type="checkbox"/> Others, specify: _____                                                                                                                         |
| Echo-cardiography | <input type="checkbox"/> Done ____ / ____<br><input type="checkbox"/> Not done | - <b>Left Ventricular Ejection Fraction:</b> ____ %<br>- <b>Cardiomyopathy:</b><br><input type="checkbox"/> No <input type="checkbox"/> Yes → <input type="checkbox"/> Dilated <input type="checkbox"/> Hypertrophic <input type="checkbox"/> Other: _____<br>- <b>Other, specify:</b> _____ |

- Diagnosis retained: \_\_\_\_\_

### F. RESPIRATORY INVOLVEMENT *To be completed at inclusion AND follow-up*

☐ Data unchanged since last form
 ☐ Not assessed
 ☐ ABSENCE
 ☐ PRESENCE \*
 \*please complete below

- Age at onset \_\_\_\_ → ☐ Patient interview data or ☐ Follow-up data
- Symptoms:
 ☐ Dyspnea on exertion
 ☐ Dyspnea at rest
 ☐ Orthopnea  
☐ Daytime sleepiness
 ☐ Morning headaches
 ☐ Others, specify: \_\_\_\_\_
- Concomitant skeletal anomalies:
 ☐ Spine deformation
 ☐ Pectus excavatum
 ☐ Other, specify: \_\_\_\_\_
 ☐ None
- Exams (if done, specify for each exam **the month and the year**):

|                     |                                                                                |                                                                                                                                                              |
|---------------------|--------------------------------------------------------------------------------|--------------------------------------------------------------------------------------------------------------------------------------------------------------|
| PFT                 | <input type="checkbox"/> Done ____ / ____<br><input type="checkbox"/> Not done | FVC sitting ____ %    FVC supine ____ %                                                                                                                      |
| Blood gases at rest | <input type="checkbox"/> Done ____ / ____<br><input type="checkbox"/> Not Done | PO <sub>2</sub> ____ mmHg    PCO <sub>2</sub> ____ mmHg    Sat ____ %                                                                                        |
| Polysomno graphy    | <input type="checkbox"/> Done ____ / ____<br><input type="checkbox"/> Not Done | <b>Type of apnea:</b> <input type="checkbox"/> Obstructive <input type="checkbox"/> Central <input type="checkbox"/> Mixed<br>Apnea index:   ____   per hour |

- Assisted ventilation:
 ☐ No
 ☐ Yes → ☐ Invasive (tracheostomy)
 ☐ Non-invasive, nasal mask  
 → ☐ Permanent
 ☐ Intermittent, as required
 ☐ Intermittent, nocturnal

## French National Registry on FSHD

### G. OCULAR INVOLVEMENT *To be completed at inclusion AND follow-up*

☐ Data unchanged since last form
 ☐ Not assessed
 ☐ ABSENCE
 ☐ PRESENCE \*
 \*please complete below

1. Age at onset: \_\_\_\_ → ☐ Patient interview data or ☐ Follow-up data
2. Diagnosis: ☐ Vascular retinopathy ☐ Retinal Detachment ☐ Coats' disease ☐ Corneal ulcer  
☐ Others, specify: \_\_\_\_\_
3. Surgery: ☐ No ☐ Yes → if yes, reason of surgery: \_\_\_\_\_

### H. AUDITORY INVOLVEMENT *To be completed at inclusion AND follow-up*

☐ Data unchanged since last form
 ☐ Not assessed
 ☐ ABSENCE
 ☐ PRESENCE\*
 \* please complete below

Year of last audiogram: \_\_\_\_ ☐ Not done

1. Age at onset: \_\_\_\_ → ☐ Patient interview data or ☐ Follow-up data
2. Hearing aid: ☐ No ☐ Yes

### I. GASTRO-INTESTINAL INVOLVEMENT *To be completed at inclusion AND follow-up*

☐ Data unchanged since last form
 ☐ Not assessed
 ☐ ABSENCE
 ☐ PRESENCE \*
 \*please complete below

1. Age at onset: \_\_\_\_ → ☐ Patient interview data or ☐ Follow-up data
2. Symptoms: ☐ Dysphagia ☐ Pulmonary aspiration → specify number of pulmonary aspirations: \_\_\_\_ / week  
☐ Other, specify: \_\_\_\_\_
3. Endoscopic evaluation of swallowing: ☐ Not done ☐ done: Dysphagia detected ? : ☐ No ☐ Yes

### J. METABOLIC INVOLVEMENT *To be completed at inclusion AND follow-up*

☐ Data unchanged since last form
 ☐ Not assessed
 ☐ ABSENCE
 ☐ PRESENCE \*
 \*please complete below

1. Age at onset: \_\_\_\_ → ☐ Patient interview data or ☐ Follow-up data
2. Diagnosis: ☐ Hypercholesterolemia ☐ Hypertriglyceridemia ☐ Other, specify: \_\_\_\_\_
3. Lipid-lowering treatment: ☐ No ☐ Yes → specify name(s) and length of treatment(s): \_\_\_\_\_

## French National Registry on FSHD

### K. ENDOCRINE INVOLVEMENT

*To be completed at inclusion AND follow-up*

☐ Data unchanged since last form

☐ Not assessed

☐ ABSENCE

☐ PRESENCE \*

\*please complete below

1. Age at onset: \_\_\_\_ → ☐ Patient interview data or ☐ Follow-up data
2. Type of disease: ☐ Thyroid disorder ☐ Diabetis ☐ Other, specify: \_\_\_\_\_
3. Hormone therapy: ☐ No ☐ Yes → specify name(s) and length of treatment(s):  
\_\_\_\_\_
4. Sexual hormone therapy: ☐ No ☐ Yes → specify name(s) and length of treatment(s):  
\_\_\_\_\_

### FOR ALL FEMALE SUBJECTS

☐ Pre-puberty ☐ Puberty ☐ Pre-menopause ☐ Menopause → Age at menopause: \_\_\_\_

- Contraceptive treatment: ☐ None ☐ Oral contraceptive ☐ Other, specify: \_\_\_\_\_

- Pregnancy: Number of pregnancies (gestity): \_\_\_\_ Number of children: \_\_\_\_

### L. TYPICAL AND ATYPICAL CHARACTERISTICS OF FSHD

*To be completed at inclusion AND follow-up*

- |                          |                                                                                                 |
|--------------------------|-------------------------------------------------------------------------------------------------|
| <input type="checkbox"/> | <b>TYPICAL:</b> at least 2 criteria in favor of a FSHD1 diagnosis <u>AND</u> 0 atypia criterion |
| <input type="checkbox"/> | <b>WITH ATYPIA:</b> at least 1 atypia criterion                                                 |

#### Check matching criteria

| CRITERIA IN FAVOR OF FSHD1 |                                                                                                                                                                 |
|----------------------------|-----------------------------------------------------------------------------------------------------------------------------------------------------------------|
| <input type="checkbox"/>   | Evidence of dominant transmission                                                                                                                               |
| <input type="checkbox"/>   | Facial involvement (orbicularis oculi or orbicularis oris)                                                                                                      |
| <input type="checkbox"/>   | Involvement of scapular fixator or tibialis anterior                                                                                                            |
| ATYPIA CRITERIA            |                                                                                                                                                                 |
| <input type="checkbox"/>   | Discordance between the degree of involvement and the number of D4Z4 RU<br><i>Example: patient with 9 RU in a wheelchair or patient with 2 UR able to walk.</i> |
| <input type="checkbox"/>   | Ptosis, ophthalmoplegia or diplopia                                                                                                                             |
| <input type="checkbox"/>   | Cardiological or respiratory involvement in the foreground OR SNC involvement                                                                                   |
| <input type="checkbox"/>   | Predominant involvement at the proximal lower limb or distal upper limb level                                                                                   |
| +                          |                                                                                                                                                                 |
| <input type="checkbox"/>   | EMG suggesting a neurogenic motor neuron disease or myotonia                                                                                                    |
| <input type="checkbox"/>   | Muscle biopsy atypical or suggesting a muscle disorder                                                                                                          |
| <input type="checkbox"/>   | Genetic diagnosis of another neuromuscular disorder confirmed                                                                                                   |
| <input type="checkbox"/>   | Others: _____                                                                                                                                                   |

**APPENDIX 1**

**BROOKE AND VIGNOS SCALES**

**UPPER LIMBS (Arms and shoulders)**

- 1** – Starting with arms at the sides, the patient can abduct the arms (kept extended) in a full circle until they touch above the head.
- 2** – Can raise arms above head only with elbows flexed or by using accessory muscles.
- 3** - Can raise hands to the mouth but cannot raise an 8-oz glass of water to the mouth (using both hands if necessary).
- 4** – Can raise hands to the mouth but cannot raise an 8-oz glass of water to the mouth.
- 5** - Cannot raise hands to the mouth but can use hands to hold a pen or pick up pennies from the table.
- 6** – Cannot raise hands to the mouth and has no useful function of hands.

**LOWER LIMBS**

- 1** – Walks and climbs stairs without assistance.
- 2** - Walks and climbs stair with the aid of the railing.
- 3** – Walks and climbs stairs slowly with the aid of the railing (over 12 seconds to climb four stairs).
- 4** – Walks unassisted and rises from a chair but cannot climb stairs.
- 5** – Walks unassisted but cannot rise from a chair or climb stairs.
- 6** – Walks only with assistance or walks independently with long leg braces.
- 7** – Walks with long leg braces but requires assistance for balance.
- 8** – Stands with long leg braces but unable to walk even with assistance
- 9** – Wheelchair-bound.
- 10** – Bedridden.

**APPENDIX 2**

**CLINICAL SEVERITY SCORE**

- 0** = No sign of muscle weakness.
- 1** = Facial weakness only.
- 2** = Mild scapular involvement without limitation of arm abduction; no awareness of disease symptoms is possible.
- 3** = Moderate involvement of scapular and arm muscles or both (arm abduction >60° and strength ≥3 in arm muscles); no involvement of pelvic and leg muscles.
- 4** = Severe scapular involvement (arm abduction <60° on at least one side); strength <3 in at least one muscular district of the arms; no involvement of pelvic and leg muscles.
- 5** = Tibioperoneal weakness; no weakness of pelvic and proximal leg muscles.
- 6** = Mild weakness of pelvic and proximal leg muscles or both (strength ≥4 in all these muscles); able to stand up from a chair without support.
- 7** = Moderate weakness of pelvic and proximal leg muscles or both (strength ≥3 in all these muscles); able to stand up from a chair with monolateral support.
- 8** = Severe weakness of pelvic and proximal leg muscles or both (strength <3 in at least one of these muscles); able to stand up from a chair with double support; unable to climb stairs; able to walk unaided.
- 9** = Unable to stand up from a chair; walking limited to several steps with support; may use wheelchair for most activities.
- 10** = Wheelchair-bound.
