# Supplementary material for: The French National Registry of patients with Facioscapulohumeral muscular dystrophy
Source: Orphanet J Rare Dis. 2018 Dec 4;13:218. doi: 10.1186/s13023-018-0960-x (PMC6280451; doi:10.1186/s13023-018-0960-x)
Supplement: Supplementary file 4 — Table S1. Pre-filling rules for the self-report and the clinical evaluation questionnaires. (PDF 59 kb) [file 13023_2018_960_MOESM4_ESM.pdf]

## Pre-filling

### Self-report questionnaire

| Condition                                                       | Pre-filling                                                        |
|-----------------------------------------------------------------|--------------------------------------------------------------------|
| <i>Physician's name</i> is filled and already known             | Autocompletion of other fields                                     |
| <i>Age of onset</i> is set to "Never"                           | <i>First symptom</i> is set to "Asymptomatic"                      |
| <i>Age of onset</i> goes from "Never" to something else         | <i>First symptom</i> is reset                                      |
| <i>First symptom</i> is set to "Asymptomatic"                   | <i>Age of onset</i> is set to "Never"                              |
| <i>First symptom</i> goes from "Asymptomatic" to something else | <i>Age of onset</i> is reset                                       |
| <i>Muscular and joint pain</i> is set to "No"                   | <i>Average daily pain</i> is set to "0.0"                          |
|                                                                 | <i>Pain area</i> is set to "No pain"                               |
| <i>Muscular and joint pain</i> goes from "No" to "Yes"          | <i>Average daily pain</i> is reset                                 |
|                                                                 | <i>Pain area</i> is reset                                          |
| <i>Average daily pain</i> is set to "0.0"                       | <i>Muscular and joint pain</i> is set to "No"                      |
|                                                                 | <i>Pain area</i> is set to "No pain"                               |
| <i>Average daily pain</i> goes from "0.0" to something else     | <i>Muscular and joint pain</i> is reset                            |
|                                                                 | <i>Pain area</i> is reset                                          |
| <i>Pain area</i> is set to "No pain"                            | If other checkboxes were set for <i>Pain area</i> , they are reset |
|                                                                 | <i>Muscular and joint pain</i> is set to "No"                      |
|                                                                 | <i>Average daily pain</i> is set to "0.0"                          |
| <i>Pain area</i> goes from "No pain" to something else          | <i>Muscular and joint pain</i> is set to "Yes"                     |
|                                                                 | If <i>Average daily pain</i> was set to "0.0", it is reset         |

### Clinical evaluation questionnaire

| Condition                                                                                                 | Pre-filling                                                                                       |
|-----------------------------------------------------------------------------------------------------------|---------------------------------------------------------------------------------------------------|
| <i>Age of onset</i> is set to "Never"                                                                     | <i>First symptom</i> is set to "Asymptomatic"                                                     |
| <i>Age of onset</i> goes from "Never" to something else                                                   | <i>First symptom</i> is reset                                                                     |
| <i>First symptom</i> is set to "Asymptomatic"                                                             | <i>Age of onset</i> is set to "Never"                                                             |
| <i>First symptom</i> goes from "Asymptomatic" to something else                                           | <i>Age of onset</i> is reset                                                                      |
| If one of the four items of <i>Manual muscular testing: Axial involvement</i> is strictly inferior to "5" | <i>Axial involvement</i> is set to "Yes" and an alert is displayed to inform the curator          |
| If one of the two items of <i>Manual muscular testing: Scapula retropulsion</i> is strictly               | <i>Scapula stabilizer muscle weakness</i> is set to "Yes" and an alert is displayed to inform the |

|                                                                                                                         |                                                                                                     |
|-------------------------------------------------------------------------------------------------------------------------|-----------------------------------------------------------------------------------------------------|
| inferior to “5”                                                                                                         | curator                                                                                             |
| If one of the 16 values of <i>Manual muscular testing: Right</i> is different from <i>Manual muscular testing: Left</i> | <i>Asymmetry</i> is set to “Yes”                                                                    |
| If all 16 values of <i>Manual muscular testing: Right</i> are the same than <i>Manual muscular testing: Left</i>        | <i>Asymmetry</i> is set to “No”                                                                     |
| <i>Ambulation</i> is set to “No”                                                                                        | <i>10mt walking test</i> is set to “Not applicable” and an alert is displayed to inform the curator |
|                                                                                                                         | <i>Four-step test</i> is set to “Not applicable” and an alert is displayed to inform the curator    |
| <i>Number of pregnancies</i> is set to “0”                                                                              | <i>Number of children</i> is set to “0” and can’t be modified                                       |
| <i>Number of pregnancies</i> goes from “0” to something else                                                            | <i>Number of children</i> is reset                                                                  |
