# Supplementary material for: The French National Registry of patients with Facioscapulohumeral muscular dystrophy
Source: Orphanet J Rare Dis. 2018 Dec 4;13:218. doi: 10.1186/s13023-018-0960-x (PMC6280451; doi:10.1186/s13023-018-0960-x)
Supplement: Supplementary file 5 — Table S2. Conflicts identification rules for the clinical evaluation questionnaire. (PDF 54 kb) [file 13023_2018_960_MOESM5_ESM.pdf]

## Conflicts

### Clinical evaluation questionnaire

| Action                                                                                                          | Alert displayed if:                                                                                                                                                                                            | Reset field                               |
|-----------------------------------------------------------------------------------------------------------------|----------------------------------------------------------------------------------------------------------------------------------------------------------------------------------------------------------------|-------------------------------------------|
| <i>Axial involvement</i> is set to "No"                                                                         | One of the four items of <i>Manual muscular testing: Axial involvement</i> is strictly inferior to "5"                                                                                                         | <i>Axial involvement</i>                  |
| <i>Scapula stabilizer muscle weakness</i> is set to "No"                                                        | One of the two items of <i>Manual muscular testing: Scapula retropulsion</i> is strictly inferior to "5"                                                                                                       | <i>Scapula stabilizer muscle weakness</i> |
| <i>Asymmetry</i> is set to "Yes"                                                                                | All 16 values of <i>Manual muscular testing: Right</i> are the same than <i>Manual muscular testing: Left</i>                                                                                                  | <i>Asymmetry</i> is set to "No"           |
| <i>Asymmetry</i> is set to "No"                                                                                 | One of the 16 values of <i>Manual muscular testing: Right</i> is different from <i>Manual muscular testing: Left</i>                                                                                           | <i>Asymmetry</i> is set to "Yes"          |
| <i>Ambulation</i> is set to "Yes"                                                                               | <i>Vignos scale</i> equals to "9" or "10"                                                                                                                                                                      | <i>Vignos scale</i>                       |
| <i>Vignos scale</i> is set to "9" or "10"                                                                       | <i>Ambulation</i> equals "Yes"                                                                                                                                                                                 | <i>Ambulation</i>                         |
| <i>10mt walking test</i> is set to something else than "Not applicable"                                         | <i>Ambulation</i> equals "No"                                                                                                                                                                                  | <i>10mt walking test</i>                  |
| <i>Four-step test</i> is set to something else than "Not applicable"                                            |                                                                                                                                                                                                                | <i>Four-step test</i>                     |
| <i>Assisted-mobility devices</i> is set to "exclusive use" for "manual wheelchair" and/or "electric wheelchair" | An alert is displayed to inform the curator to verify if:<br>- <i>Ambulation</i> is set to "No"<br>- <i>10mt walking test</i> is set to "Not applicable"<br>- <i>Four-step test</i> is set to "Not applicable" |                                           |
| <i>Ambulation</i> is set to "Yes"                                                                               | <i>Assisted-mobility devices</i> equals "exclusive use" for "manual wheelchair" and/or "electric wheelchair"                                                                                                   | <i>Ambulation</i>                         |
| <i>10mt walking test</i> is set to something else than "Not applicable"                                         |                                                                                                                                                                                                                | <i>10mt walking test</i>                  |
| <i>Four-step test</i> is set to something else than "Not applicable"                                            |                                                                                                                                                                                                                | <i>Four-step test</i>                     |
| <i>Vignos scale</i> is strictly inferior to "8"                                                                 |                                                                                                                                                                                                                | <i>Vignos scale</i>                       |
| <i>Clinical severity score</i> is strictly inferior to "9"                                                      |                                                                                                                                                                                                                | <i>Clinical severity score</i>            |
